# Supplementary material for: Grainyhead-like 2 (GRHL2) inhibits keratinocyte differentiation through epigenetic mechanism
Source: PubMed Central journal article supplement — Cell Death Dis. 2012 Dec 20;3(12):e450–. doi: 10.1038/cddis.2012.190 (PMC3542624; doi:10.1038/cddis.2012.190), 2012-12-20

| <b>Supplement Table S1. Primer sequences for RT-qPCR shown in Figure 1</b> |                                  |                                  |
|----------------------------------------------------------------------------|----------------------------------|----------------------------------|
| <b>Genes</b>                                                               | <b>Forward primer (5' to 3')</b> | <b>Reverse primer (5' to 3')</b> |
| <i>ANLN</i>                                                                | agaaatttgtctgcaatctcaatct        | ttccaggaaaggcttaattcc            |
| <i>BRCA2</i>                                                               | agcttactccggcctcaaaa             | ttcctccaatgcttggttaataa          |
| <i>CASC5</i>                                                               | tacagaaacccccgacagagc            | tcttctggagtaggtggtgtgtt          |
| <i>DEPDC1</i>                                                              | ctatggagagtcaggggtgtgc           | gaaaagatgtggtaacttcattcca        |
| <i>DIAPH3</i>                                                              | gggaaaaggacttcagtatcaaaa         | tgagatctgtcggcttctctta           |
| <i>DLG7</i>                                                                | catgtgaagaagactttgtttttga        | ggtaatccaggacactgagca            |
| <i>DTL</i>                                                                 | atgctcttcaattcgggtgct            | gggtattgtgaagaccatccat           |
| <i>FANCI</i>                                                               | caccacacttacagcccttg             | attcctccggagctctgac              |
| <i>FOXMI</i>                                                               | actttaagcacattgccaagc            | cgtgcagggaaagggtgt               |
| <i>GRHL2</i>                                                               | gaaagtccagtttcaccagagg           | ggcactaaggccactagtctttt          |
| <i>TERT</i>                                                                | gccttcaagagccacgctc              | ccacgaactgtcgcagt                |
| <i>LCE3D</i>                                                               | ctcctctgcacctggacaa              | cacttgggtgagggacactt             |
| <i>LCE3E</i>                                                               | acgcatgccttcccatatac             | gagctcagatccccacag               |
| <i>PBK</i>                                                                 | ccactggatgaaaatatgactgtg         | tccacagcttctttgggttt             |
| <i>TOP2A</i>                                                               | caacatgcccaattgagtgaaa           | acttgggctttaaacttcacc            |
| <i>INK4A</i>                                                               | gtggacctggctgaggag               | ctttcaatcggggatgtctg             |
| <i>GRHL1</i>                                                               | gccagatcaaggctcttctgtg           | tgctttgctttcgttcttca             |
| <i>GRHL3</i>                                                               | caagaaatgcaagcgagga              | gaattttgccgtccagctc              |
| <i>HELLS</i>                                                               | ggatggctgaattcaaaagatt           | caagatccctttccgtttgt             |
| <i>SPRR2A</i>                                                              | aaccctggtacctgagca               | cttgcactgctgctgttgat             |
| <i>IVL</i>                                                                 | gaaagcagaaaaccagagc              | tagctgctgatccctttgtg             |
| <i>GAPDH</i>                                                               | agccacatcgctcagacac              | gccaataacgaccaaatcc              |

| <b>Supplement Table S2. Primer sequences for ChIP analyses (shown in Figure 2) for GRHL2 binding to promoters.</b> |                                    |                                    |
|--------------------------------------------------------------------------------------------------------------------|------------------------------------|------------------------------------|
| <b>Genes</b>                                                                                                       | <b>Forward sequence (5' to 3')</b> | <b>Reverse sequence (5' to 3')</b> |
| <i>ANLN</i> (-230 to -89): R1                                                                                      | gggggtggagccaggaacc                | tgcgctcgggtcacgtggc                |
| <i>ANLN</i> (-103 to 57): R2                                                                                       | acgtgaccgagcgcaggg                 | ggcgggggaactctcca                  |
| <i>NCAPG2</i> (-396 to -245):R1                                                                                    | tctcttctctctccttctctct<br>cct      | acagctggggaacctatgc                |
| <i>NCAPG2</i> (-260 to -111):R2                                                                                    | tgggttccccagctgtggc                | cccgcctccagatcatgcc                |
| <i>PBK</i> (-258 to -101): R1                                                                                      | ttggagagagcttcagccttc<br>agc       | tctcccaggactcccgggtgc              |
| <i>PBK</i> (-101 to 57): R2                                                                                        | agggaggaggaacggcgaat               | ccctgcagctgcctctagca               |
| <i>ADFP</i> (-237 to -96): R1                                                                                      | ggctcccagacaggctcctctc             | agcccagtggtcaccctcgg               |
| <i>ADFP</i> (-106 to 33): R2                                                                                       | acactcgggcttgggacagg               | gaagacgactccggctgcca               |
| <i>Ki67</i> (-256 to -107): R1                                                                                     | cgttttcgtttgaaattgggcg             | gaccgggtggcctacagg                 |
| <i>Ki67</i> (-114 to 45): R2                                                                                       | accgggtccccgctcagagg               | agtccgcccagaggagagc                |
| <i>GRHL1</i> (-278 to -113): R1                                                                                    | agcgtccctctcctgtcag                | gattggtcggcgagaagagc               |
| <i>GRHL1</i> (-116 to 92): R2                                                                                      | aatcaggaggcgcgaccgg                | acagtacaccgatccggg                 |
| <i>GRHL3</i> (-278 to -111): R1                                                                                    | gtccctgtacttttctcttag<br>ttat      | agctgttaactcttagcccc               |
| <i>GRHL3</i> (-110 to 43): R2                                                                                      | gcacctgttgaggatatacctc             | tgcttgacacagacattctc               |

|                                     |                       |                        |
|-------------------------------------|-----------------------|------------------------|
| <i>CCNB1</i> (-241 to -91): R1      | gcagaggcagaccacgtgag  | tgttcgtggcactcactccc   |
| <i>CCNB1</i> (-96 to 53): R2        | cgaacaggccaataaggagg  | cagcggggagaagcagaaca   |
| <i>TRIP13</i> (-260 to -110): R1    | cttcttggtgcttcttgccat | ccagcgagctcggcaacct    |
|                                     | gg                    |                        |
| <i>TRIP13</i> (-128 to 56): R2      | aggttgccgagctcgetgg   | ccacctcacgcccagcgtc    |
| <i>CCNA2</i> (-297 to -150): R1     | ttccctaaaggcttagagtc  | agggagaaacaaactggctg   |
|                                     | ag                    |                        |
| <i>CCNA2</i> (-181 to -3): R2       | tttctccctcctgccccgc   | gagcggcggtgttcttgc     |
| <i>TPX2</i> (-249 to -98): R1       | caaatagtttggagcagagca | cagcaataccggaagtcaga   |
|                                     | c                     |                        |
| <i>TPX2</i> (-105 to 45): R2        | tattgctgcggtctgtaggg  | cagatctgacaacgaagcgc   |
| <i>BUB1</i> (-291 to -92): R1       | aaaccaattccctacgcccg  | tgctcggaggtaagtcca     |
| <i>BUB1</i> (-84 to 92): R2         | cggtgattggccaaccttc   | gaaggacattttccggggtg   |
| <i>RRM2</i> (-250 to -99): R1       | ggaaccgggaggtcccgg    | tccgacccttcccattggc    |
| <i>RRM2</i> (-100 to 56): R2        | gaggcatggcacagccaatg  | cagcgaagcagagcgagcag   |
| <i>CDC20</i> (-218 to -23): R1      | cagtactagtcctctggcgc  | ttaaactctccgctccgag    |
| <i>CDC20</i> (-17 to 188): R2       | gtaagccaggcgtgttaaagc | tggaggaaaggaggcgacg    |
|                                     | c                     |                        |
| <i>CRCT1</i> (-295 to -101): R1     | cctcccaggtacaaacagtg  | gtgctcagctgacactcaca   |
| <i>CRCT1</i> (-103 to 69): R2       | cacgtctggtgggaaatggg  | cccagaccctgctaggagac   |
| <i>NUF2</i> (-307 to -140): R1      | acttctccttgtcaccctg   | actgcaggaagtgggagcac   |
| <i>NUF2</i> (-142 to 9): R2         | agtccgaggttccgactcgac | ccccattccgccaagcccac   |
|                                     | gc                    |                        |
| <i>DTL</i> (-206 to -57): R1        | tcaagccctgttacgcatgc  | gcgctcagagtcatttccc    |
| <i>DTL</i> (-45 to 134): R2         | gtcgctcggaagccaatcag  | cggaggaaaagcctcagctg   |
| <i>EXO1</i> (-305 to -153): R1      | cacagtgagttaggggctcg  | gaggtgacgcgcaggtcgc    |
|                                     | g                     |                        |
| <i>EXO1</i> (-152 to 7): R2         | cgaccctcctctcgggatc   | ccctccgttactgaactgc    |
| <i>SPRR2A</i> (-249 to -99): R1     | agtccctctttgccataagt  | ccagatgcaaatttatccat   |
| <i>SPRR2A</i> (-98 to 70): R2       | cttaagaaattactggatcag | aacgagggaactcaaggaag   |
|                                     | c                     |                        |
| <i>CEP55</i> (-243 to -81): R1      | cagaattagctggcgggcc   | aagaaggaggagcagcgcgc   |
| <i>CEP55</i> (-94 to 60): R2        | tgctcctccttcttgccgg   | ccttggggccagctagcagc   |
| <i>HELLS</i> (-246 to -97): R1      | ttctccacgatcggccacct  | at ttggcgcagcttgccggtt |
| <i>HELLS</i> (-110 to 42): R2       | aagctgcgccaaatctcgcg  | ctcctcacaaccgctgccgg   |
| <i>C13orf3</i> (-251 to -102): R1   | tccagagaagcggggagccc  | gacgggtgcgcttacgccac   |
| <i>C13orf3</i> (-110 to 46): R2     | cgtctcgcggggtctcctgg  | ccaggcgtacgcagacccca   |
| <i>DIAPH3</i> (-259 to -110): R1    | aaagaaatccaggccgatga  | cactgcaggacatgattggc   |
| <i>DIAPH3</i> (-96 to 64): R2       | gtgcctcagcgtgtcattga  | aacaggttttactcccgggg   |
| <i>DLG7</i> (-233 to -79): R1       | cactcccgccttcacctga   | tgcgattggtttgctccgtg   |
| <i>DLG7</i> (-80 to 79): R2         | caagcctcgttgagtggag   | agaacactcggctctggacg   |
| <i>ARHGAP11A</i> (-281 to -131): R1 | cgggaaataagttgtctttat | gcaaaccagcaaacatgaa    |
|                                     | at tt                 |                        |
| <i>ARHGAP11A</i> (-125 to 25): R2   | ttgcccgttacacccttgc   | acaccgcagtttcagccca    |
| <i>PCNA</i> (-250 to -65): R1       | ggaccgatctccacatatgc  | ttgcggggaagactttaggg   |

|                                     |                        |                       |
|-------------------------------------|------------------------|-----------------------|
| <i>PCNA</i> (-65 to 126): R2        | tggacagcgtggtgacgtc    | aggcgggaaggaggaaagt   |
| <i>LCE3D</i> (-260 to -114): R1     | ttgaaacaaggaagaaggag   | aaggcacacgcccgaagacta |
| <i>LCE3D</i> (-112 to 31): R2       | g                      |                       |
| <i>LCE3D</i> (-112 to 31): R2       | ccttgttgacacctcccctg   | gtgcagaggaggcaggagaa  |
| <i>KIF11</i> (-277 to -89): R1      | tatttctctctctgcagctgag | tatcctcactggagccccgc  |
|                                     | gga                    |                       |
| <i>KIF11</i> (-90 to 129): R2       | tactgcatcccatggtgcctt  | ggcctggaggaccgacgcac  |
|                                     | gc                     |                       |
| <i>CCNB2</i> (-266 to -111): R1     | aaattcgtagatgaggccttg  | acgtttgattgtcacaacag  |
|                                     |                        | c                     |
| <i>CCNB2</i> (-108 to 96): R2       | cgtgtctaagaaaattcagcc  | gggaggacactagcgtacga  |
|                                     | a                      |                       |
| <i>KIF23</i> (-292 to -92): R1      | aaccctcagtttcgtcatgcg  | acctccgcggaagtgacttc  |
| <i>KIF23</i> (-100 to 50): R2       | gaggctctgcctctcccctgc  | gacgttaggaccggcagcaa  |
| <i>KIAA0101</i> (-300 to -150): R1  | gaaacttagcaccactagtc   | aaccaattgccaatgccag   |
|                                     | ggg                    |                       |
| <i>KIAA0101</i> (-96 to 55): R2     | aattggttcagggggaacgg   | ccgcaccatgttcaacaag   |
|                                     |                        | aag                   |
| <i>CCNB1</i> (-241 to -91): R1      | gcagaggcagaccacgtgag   | tgttcgtggcactcactccc  |
| <i>CCNB1</i> (-96 to 53): R2        | cgaacaggccaataaggaggg  | cagcggggagaagcagaaca  |
| <i>FANCI</i> (-288 to -114): R1     | cggggccaccaattgtgagt   | ccagctcacagtcggagggg  |
| <i>FANCI</i> (-131 to 32): R2       | cctccgactgtgagctggga   | aaaagcccgtcaacccaac   |
| <i>PRC1</i> (-250 to -111): R1      | gaggagtcccttgaggctgcc  | gcaatcgggggtgggactc   |
| <i>PRC1</i> (-115 to 48): R2        | attgcgcaccgcgacttca    | cccgcaaacaccggcgatg   |
|                                     | aattcctcctctctcggggct  | taaaatccaaacccgcccgc  |
| <i>PLK1</i> (-272 to -96): R1       | g                      |                       |
| <i>PLK1</i> (-101 to 44): R2        | atthtaaatccccgcggcca   | tgcagcactcatgctcccga  |
|                                     | atatctcatttccaggcattg  | accaacactgccccctcgc   |
| <i>SHCBP1</i> (-251 to -98): R1     | ctgg                   |                       |
| <i>SHCBP1</i> (-106 to 38): R2      | agtgttggtgggggctgga    | ccgtcagcgaccctcag     |
| <i>TOP2A</i> (-250 to -101): R1     | attccctgtcaatctctccg   | gaaccaatcgtagcttgcc   |
| <i>TOP2A</i> (-103 to 49): R2       | ttcttctggacggagacggtg  | taaacaggcaggaccccacg  |
| <i>NCAPG</i> (-263 to -92): R1      | aaggccactccgctcagctc   | aagagagcgggaagcagtg   |
| <i>NCAPG</i> (-91 to 89): R2        | ctcccaaagcgcttacggca   | ggaaccctgccgggacgagt  |
| <i>HIST1H2BM</i> (-254 to -107): R1 | gagctttgcctccctgctta   | aaacgtaagccaatcgcaca  |
| <i>HIST1H2BM</i> (-98 to 62): R2    | tttagaccaataggactcgag  | acaaccttagggctgthttcg |
|                                     | tatg                   |                       |
| <i>HIST1H1B</i> (-233 to -84): R1   | ctttcatcaattgcacaagat  | cccaaattgtgthttgtagt  |
|                                     | tc                     | cc                    |
| <i>HIST1H1B</i> (-97 to 78): R2     | aaacacaatttgggagtgcca  | ggtggcaagaaactgctaga  |

Note: R1 and R2 represent Region 1 and Region 2 of promoters as denoted in Figure 2.

**Supplement Figure S1 – Specificity of the GRHL2 antibody for in situ staining.** NHEK/LXSN and NHEK/GRHL2, as well as HaCaT cells infected with LV-EGFP or LV-GRHL2i, were cultured in chamber slides and stained in situ for GRHL2 by immunoperoxidase (IPS) staining, according to the methods described elsewhere (Kang et al., 2000). We included IgG as negative control. Bar represents 50  $\mu$ m.

Supplement Figure S1

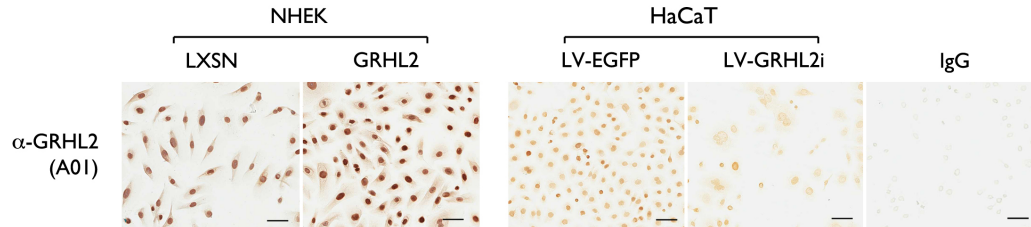

Supplement: cddis2012190x1.pdf [file cddis2012190x1.pdf]
